# Supplementary material
Source: publisher figshare collection journal article supplement (https://acs.figshare.com/ndownloader/files/5119933)
Supplement: Supplementary file 1 [file 5119933]

data_CuCN04
_publ_requested_journal          Inorg.Chem.
_publ_contact_author_name        'Do-hyeon Kim'
_publ_contact_author_email       epstein823@naver.com
loop_
_publ_author_name
_publ_author_address
'Do-hyeon, Kim' ''
'Ja-eung, Koo' ''
'Youngkyu, Do' ''

loop_

_audit_creation_method SHELXL
_chemical_name_common            CuCN1dMeOH
_chemical_formula_moiety         ?
_chemical_formula_structural     '[Cu(CN)3]n[Cu(cyclam)]n(CH3OH)n'
_chemical_formula_analytical     ?
_chemical_formula_sum            'C14 H28 Cu2 N7 O'
_chemical_formula_weight         437.51

loop_
_atom_type_symbol
_atom_type_description
_atom_type_scat_dispersion_real
_atom_type_scat_dispersion_imag
_atom_type_scat_source
C C 0.0033 0.0016 'International Tables Vol C Tables 4.2.6.8 and 6.1.1.4'
H H 0.0000 0.0000 'International Tables Vol C Tables 4.2.6.8 and 6.1.1.4'
N N 0.0061 0.0033 'International Tables Vol C Tables 4.2.6.8 and 6.1.1.4'
O O 0.0106 0.0060 'International Tables Vol C Tables 4.2.6.8 and 6.1.1.4'
Cu Cu 0.3201 1.2651 'International Tables Vol C Tables 4.2.6.8 and 6.1.1.4'

_symmetry_cell_setting           triclinic
_symmetry_space_group_name_H-M   P-1

loop_
_symmetry_equiv_pos_as_xyz
'x, y, z'
'-x, -y, -z'

_cell_length_a                   9.4699(11)
_cell_length_b                   10.0338(12)
_cell_length_c                   12.0635(14)
_cell_angle_alpha                67.325(2)
_cell_angle_beta                 75.593(2)
_cell_angle_gamma                70.672(2)
_cell_volume                     988.3(2)
_cell_formula_units_Z            2
_cell_measurement_temperature    293(2)
_cell_measurement_reflns_used    ?
_cell_measurement_theta_min      ?
_cell_measurement_theta_max      ?

_exptl_crystal_description       ?
_exptl_crystal_colour            purple
_exptl_crystal_preparation       methanol
_exptl_crystal_size_max          ?
_exptl_crystal_size_mid          ?
_exptl_crystal_size_min          ?
_exptl_crystal_density_meas      ?
_exptl_crystal_density_diffrn    1.470
_exptl_crystal_density_method    ?
_exptl_crystal_F_000             454
_exptl_absorpt_coefficient_mu    2.167
_exptl_absorpt_correction_type   empirical
_exptl_absorpt_correction_T_min  ?
_exptl_absorpt_correction_T_max  ?

_exptl_special_details           
; 
 ? 
;

_diffrn_ambient_temperature      293(2)
_diffrn_radiation_wavelength     0.71073
_diffrn_radiation_type           MoK\a
_diffrn_radiation_source         'fine-focus sealed tube'
_diffrn_radiation_monochromator  graphite
_diffrn_measurement_device       'SMART 1K'
_diffrn_measurement_method       'omega scan'
_diffrn_standards_number         ?
_diffrn_standards_interval_count ?
_diffrn_standards_interval_time  ?
_diffrn_standards_decay_%        ?
_diffrn_reflns_number            6284
_diffrn_reflns_av_R_equivalents  0.0279
_diffrn_reflns_av_sigmaI/netI    0.0359
_diffrn_reflns_limit_h_min       -12
_diffrn_reflns_limit_h_max       12
_diffrn_reflns_limit_k_min       -12
_diffrn_reflns_limit_k_max       12
_diffrn_reflns_limit_l_min       -15
_diffrn_reflns_limit_l_max       13
_diffrn_reflns_theta_min         1.85
_diffrn_reflns_theta_max         28.30
_reflns_number_total             4363
_reflns_number_observed          3346
_reflns_observed_criterion       >2sigma(I)

_computing_data_collection       SMART
_computing_cell_refinement       SMART
_computing_data_reduction        SAINT
_computing_structure_solution    'SHELXS-86 (Sheldrick, 1990)'
_computing_structure_refinement  'SHELXL-93 (Sheldrick, 1993)'
_computing_molecular_graphics    ORTEP
_computing_publication_material  'MS WORD'

_refine_special_details          
; 
 Refinement on F^2^ for ALL reflections except for 0 with very negative F^2^ 
 or flagged by the user for potential systematic errors.  Weighted R-factors 
 wR and all goodnesses of fit S are based on F^2^, conventional R-factors R 
 are based on F, with F set to zero for negative F^2^. The observed criterion 
 of F^2^ > 2sigma(F^2^) is used only for calculating _R_factor_obs etc. and is 
 not relevant to the choice of reflections for refinement.  R-factors based 
 on F^2^ are statistically about twice as large as those based on F, and R- 
 factors based on ALL data will be even larger. 
;

_refine_ls_structure_factor_coef Fsqd
_refine_ls_matrix_type           full
_refine_ls_weighting_scheme      
'calc w=1/[\s^2^(Fo^2^)+(0.0701P)^2^+0.0000P] where P=(Fo^2^+2Fc^2^)/3'
_atom_sites_solution_primary     direct
_atom_sites_solution_secondary   difmap
_atom_sites_solution_hydrogens   geom
_refine_ls_hydrogen_treatment    riding
_refine_ls_extinction_method     none
_refine_ls_extinction_coef       ?
_refine_ls_number_reflns         4363
_refine_ls_number_parameters     235
_refine_ls_number_restraints     0
_refine_ls_R_factor_all          0.0530
_refine_ls_R_factor_obs          0.0401
_refine_ls_wR_factor_all         0.1111
_refine_ls_wR_factor_obs         0.1055
_refine_ls_goodness_of_fit_all   1.003
_refine_ls_goodness_of_fit_obs   1.095
_refine_ls_restrained_S_all      1.003
_refine_ls_restrained_S_obs      1.095
_refine_ls_shift/esd_max         0.001
_refine_ls_shift/esd_mean        0.000

loop_
_atom_site_label
_atom_site_type_symbol
_atom_site_fract_x
_atom_site_fract_y
_atom_site_fract_z
_atom_site_U_iso_or_equiv
_atom_site_thermal_displace_type
_atom_site_occupancy
_atom_site_calc_flag
_atom_site_refinement_flags
_atom_site_disorder_group
Cu2 Cu 0.73363(4) 1.01195(4) 0.25601(3) 0.03687(12) Uani 1 d . .
Cu1 Cu 0.25178(4) 0.88021(4) 0.27359(3) 0.04733(13) Uani 1 d . .
N21 N 0.7488(3) 1.0485(3) 0.4057(2) 0.0382(5) Uani 1 d . .
N23 N 0.7336(3) 0.9777(3) 0.1016(2) 0.0427(6) Uani 1 d . .
N22 N 0.8557(3) 0.7999(3) 0.3324(2) 0.0418(6) Uani 1 d . .
C23 C 0.8214(4) 0.6787(4) 0.3114(4) 0.0584(8) Uani 1 d . .
H23A H 0.7190(4) 0.6741(4) 0.3487(4) 0.070 Uiso 1 calc R .
H23B H 0.8894(4) 0.5837(4) 0.3500(4) 0.070 Uiso 1 calc R .
N24 N 0.6259(3) 1.2274(3) 0.1733(2) 0.0454(6) Uani 1 d . .
C3 C 0.0908(3) 1.0214(4) 0.1800(3) 0.0480(7) Uani 1 d . .
C2 C 0.4041(3) 0.9291(4) 0.3208(3) 0.0463(7) Uani 1 d . .
C21 C 0.8615(3) 0.9177(4) 0.4722(3) 0.0481(7) Uani 1 d . .
H21A H 0.8454(3) 0.9106(4) 0.5566(3) 0.058 Uiso 1 calc R .
H21B H 0.9627(3) 0.9286(4) 0.4374(3) 0.058 Uiso 1 calc R .
C26 C 0.6203(3) 1.1076(4) 0.0348(3) 0.0542(8) Uani 1 d . .
H26A H 0.5193(3) 1.0964(4) 0.0699(3) 0.065 Uiso 1 calc R .
H26B H 0.6365(3) 1.1140(4) -0.0495(3) 0.065 Uiso 1 calc R .
C22 C 0.8443(4) 0.7780(4) 0.4629(3) 0.0518(8) Uani 1 d . .
H22A H 0.9231(4) 0.6918(4) 0.4992(3) 0.062 Uiso 1 calc R .
H22B H 0.7472(4) 0.7609(4) 0.5053(3) 0.062 Uiso 1 calc R .
N2 N 0.4943(3) 0.9550(3) 0.3500(3) 0.0577(7) Uani 1 d . .
C30 C 0.7758(4) 1.1921(4) 0.3888(3) 0.0504(7) Uani 1 d . .
H30A H 0.8746(4) 1.1967(4) 0.3420(3) 0.061 Uiso 1 calc R .
H30B H 0.7760(4) 1.1973(4) 0.4674(3) 0.061 Uiso 1 calc R .
C25 C 0.7168(4) 0.8327(4) 0.1112(3) 0.0533(8) Uani 1 d . .
H25A H 0.7241(4) 0.8298(4) 0.0305(3) 0.064 Uiso 1 calc R .
H25B H 0.6176(4) 0.8227(4) 0.1541(3) 0.064 Uiso 1 calc R .
C28 C 0.6660(4) 1.3473(4) 0.1920(3) 0.0603(9) Uani 1 d . .
H28A H 0.5982(4) 1.4430(4) 0.1545(3) 0.072 Uiso 1 calc R .
H28B H 0.7679(4) 1.3502(4) 0.1521(3) 0.072 Uiso 1 calc R .
C27 C 0.6372(4) 1.2470(4) 0.0434(3) 0.0573(9) Uani 1 d . .
H27A H 0.7343(4) 1.2640(4) 0.0007(3) 0.069 Uiso 1 calc R .
H27B H 0.5584(4) 1.3329(4) 0.0066(3) 0.069 Uiso 1 calc R .
C24 C 0.8370(4) 0.7022(4) 0.1779(3) 0.0604(9) Uani 1 d . .
H24A H 0.8331(4) 0.6114(4) 0.1692(3) 0.072 Uiso 1 calc R .
H24B H 0.9356(4) 0.7187(4) 0.1395(3) 0.072 Uiso 1 calc R .
C29 C 0.6570(4) 1.3250(4) 0.3243(3) 0.0611(9) Uani 1 d . .
H29A H 0.5579(4) 1.3124(4) 0.3653(3) 0.073 Uiso 1 calc R .
H29B H 0.6668(4) 1.4148(4) 0.3309(3) 0.073 Uiso 1 calc R .
N3 N -0.0063(3) 1.0903(4) 0.1248(3) 0.0687(8) Uani 1 d . .
C1 C 0.2472(4) 0.6762(4) 0.3111(4) 0.0647(10) Uani 1 d . .
N1 N 0.2357(5) 0.5621(4) 0.3232(4) 0.1015(13) Uani 1 d . .
O11 O 0.3028(4) 0.3613(5) 0.2056(6) 0.147(2) Uani 1 d . .
H11 H 0.2753(13) 0.4146(89) 0.2483(74) 0.220 Uiso 1 calc R .
C11 C 0.1807(6) 0.3583(6) 0.1677(6) 0.099(2) Uani 1 d . .
H11A H 0.0982(15) 0.3529(43) 0.2330(11) 0.149 Uiso 1 calc R .
H11B H 0.2055(15) 0.2723(24) 0.1427(33) 0.149 Uiso 1 calc R .
H11C H 0.1519(27) 0.4476(21) 0.1005(23) 0.149 Uiso 1 calc R .
H22 H 0.9420(35) 0.7970(31) 0.3086(26) 0.033(8) Uiso 1 d . .
H24 H 0.5422(34) 1.2338(31) 0.2007(26) 0.032(8) Uiso 1 d . .
H21 H 0.6596(35) 1.0460(31) 0.4505(26) 0.038(8) Uiso 1 d . .
H23 H 0.8183(38) 0.9869(33) 0.0560(29) 0.046(9) Uiso 1 d . .

loop_
_atom_site_aniso_label
_atom_site_aniso_U_11
_atom_site_aniso_U_22
_atom_site_aniso_U_33
_atom_site_aniso_U_23
_atom_site_aniso_U_13
_atom_site_aniso_U_12
Cu2 0.0352(2) 0.0412(2) 0.0368(2) -0.01275(15) -0.01197(14) -0.00840(14)
Cu1 0.0375(2) 0.0631(3) 0.0495(2) -0.0263(2) -0.0025(2) -0.0170(2)
N21 0.0318(12) 0.0501(14) 0.0372(13) -0.0164(11) -0.0064(10) -0.0130(10)
N23 0.0323(12) 0.060(2) 0.0390(14) -0.0193(12) -0.0062(11) -0.0124(11)
N22 0.0309(13) 0.0452(14) 0.0463(14) -0.0128(11) -0.0067(11) -0.0083(10)
C23 0.058(2) 0.045(2) 0.072(2) -0.019(2) -0.010(2) -0.0140(15)
N24 0.0394(15) 0.0488(15) 0.0423(14) -0.0110(11) -0.0110(12) -0.0052(11)
C3 0.0364(15) 0.062(2) 0.050(2) -0.022(2) 0.0009(13) -0.0200(14)
C2 0.0359(15) 0.062(2) 0.043(2) -0.0205(14) 0.0019(12) -0.0172(13)
C21 0.0369(15) 0.068(2) 0.039(2) -0.0157(14) -0.0114(12) -0.0116(14)
C26 0.039(2) 0.085(2) 0.038(2) -0.022(2) -0.0114(13) -0.0092(15)
C22 0.050(2) 0.052(2) 0.043(2) -0.0042(14) -0.0126(14) -0.0082(14)
N2 0.0422(15) 0.079(2) 0.060(2) -0.0246(15) -0.0044(13) -0.0261(14)
C30 0.052(2) 0.063(2) 0.051(2) -0.026(2) -0.0047(15) -0.028(2)
C25 0.046(2) 0.076(2) 0.057(2) -0.039(2) -0.0013(15) -0.024(2)
C28 0.067(2) 0.042(2) 0.065(2) -0.007(2) -0.020(2) -0.011(2)
C27 0.052(2) 0.060(2) 0.043(2) -0.0023(15) -0.0182(15) -0.003(2)
C24 0.055(2) 0.060(2) 0.077(3) -0.040(2) 0.001(2) -0.015(2)
C29 0.070(2) 0.049(2) 0.073(2) -0.028(2) -0.013(2) -0.015(2)
N3 0.046(2) 0.084(2) 0.075(2) -0.020(2) -0.013(2) -0.021(2)
C1 0.053(2) 0.064(2) 0.083(3) -0.029(2) -0.022(2) -0.007(2)
N1 0.113(3) 0.065(2) 0.139(4) -0.039(2) -0.036(3) -0.020(2)
O11 0.068(2) 0.155(4) 0.268(6) -0.158(4) -0.034(3) 0.018(2)
C11 0.089(3) 0.091(3) 0.131(4) -0.052(3) -0.025(3) -0.015(3)

_geom_special_details            
; 
 All esds (except the esd in the dihedral angle between two l.s. planes) 
 are estimated using the full covariance matrix.  The cell esds are taken 
 into account individually in the estimation of esds in distances, angles 
 and torsion angles; correlations between esds in cell parameters are only 
 used when they are defined by crystal symmetry.  An approximate (isotropic) 
 treatment of cell esds is used for estimating esds involving l.s. planes. 
;

loop_
_geom_bond_atom_site_label_1
_geom_bond_atom_site_label_2
_geom_bond_distance
_geom_bond_site_symmetry_2
_geom_bond_publ_flag
Cu2 N23 2.020(2) . ?
Cu2 N21 2.023(2) . ?
Cu2 N24 2.024(3) . ?
Cu2 N22 2.025(2) . ?
Cu2 N2 2.414(3) . ?
Cu1 C1 1.932(4) . ?
Cu1 C2 1.934(3) . ?
Cu1 C3 1.949(3) . ?
N21 C30 1.474(4) . ?
N21 C21 1.481(4) . ?
N23 C25 1.473(4) . ?
N23 C26 1.481(4) . ?
N22 C23 1.479(4) . ?
N22 C22 1.484(4) . ?
C23 C24 1.511(5) . ?
N24 C28 1.482(4) . ?
N24 C27 1.482(4) . ?
C3 N3 1.139(4) . ?
C2 N2 1.134(4) . ?
C21 C22 1.511(5) . ?
C26 C27 1.503(5) . ?
C30 C29 1.515(5) . ?
C25 C24 1.521(5) . ?
C28 C29 1.508(5) . ?
C1 N1 1.135(5) . ?
O11 C11 1.359(6) . ?

loop_
_geom_angle_atom_site_label_1
_geom_angle_atom_site_label_2
_geom_angle_atom_site_label_3
_geom_angle
_geom_angle_site_symmetry_1
_geom_angle_site_symmetry_3
_geom_angle_publ_flag
N23 Cu2 N21 175.84(10) . . ?
N23 Cu2 N24 86.01(10) . . ?
N21 Cu2 N24 94.29(10) . . ?
N23 Cu2 N22 93.45(10) . . ?
N21 Cu2 N22 85.95(10) . . ?
N24 Cu2 N22 175.87(11) . . ?
N23 Cu2 N2 94.07(10) . . ?
N21 Cu2 N2 90.08(10) . . ?
N24 Cu2 N2 90.51(11) . . ?
N22 Cu2 N2 93.61(10) . . ?
C1 Cu1 C2 122.40(14) . . ?
C1 Cu1 C3 111.04(14) . . ?
C2 Cu1 C3 126.53(14) . . ?
C30 N21 C21 112.6(2) . . ?
C30 N21 Cu2 117.5(2) . . ?
C21 N21 Cu2 107.4(2) . . ?
C25 N23 C26 113.2(2) . . ?
C25 N23 Cu2 118.2(2) . . ?
C26 N23 Cu2 106.4(2) . . ?
C23 N22 C22 113.2(3) . . ?
C23 N22 Cu2 117.2(2) . . ?
C22 N22 Cu2 106.3(2) . . ?
N22 C23 C24 112.1(3) . . ?
C28 N24 C27 113.1(3) . . ?
C28 N24 Cu2 118.4(2) . . ?
C27 N24 Cu2 107.0(2) . . ?
N3 C3 Cu1 172.4(3) . . ?
N2 C2 Cu1 178.7(3) . . ?
N21 C21 C22 108.6(2) . . ?
N23 C26 C27 108.3(2) . . ?
N22 C22 C21 108.0(2) . . ?
C2 N2 Cu2 135.8(3) . . ?
N21 C30 C29 112.1(2) . . ?
N23 C25 C24 111.7(2) . . ?
N24 C28 C29 112.7(3) . . ?
N24 C27 C26 108.5(3) . . ?
C23 C24 C25 114.4(3) . . ?
C28 C29 C30 114.3(3) . . ?
N1 C1 Cu1 172.7(4) . . ?

_refine_diff_density_max         0.855
_refine_diff_density_min         -0.599
_refine_diff_density_rms         0.088
